# Supplementary material for: One-step esterification of nanocellulose in a Brønsted acid ionic liquid for delivery to glioblastoma cancer cells
Source: Royal Society of Chemistry journal article supplement (doi:10.1039/c7nj04633b), 2018-01-01
Supplement: c7nj04633b1.pdf [file c7nj04633b1.pdf]

## New Journal of Chemistry

### Supporting Information

#### **One-step esterification of nanocellulose in Brønsted acid Ionic Liquid for delivery to Glioblastoma Cancer cells.**

L. Cellante,<sup>a†</sup> R. Costa,<sup>b†</sup> I. Monaco,<sup>a</sup> G. Cenacchi,<sup>b</sup> E. Locatelli<sup>a\*</sup>

*a. Department of Industrial Chemistry "Toso Montanari", Viale Risorgimento 4, 40136, Bologna, Italy.*

*b. Department of Biomedical and Neuromotor Sciences – DIBINEM, via Massarenti 9, 40138, Bologna, Italy.*

## Preparation of N-methylpyrrolidinium hydrogen sulfate [MepyrrH][HSO4]<sup>1</sup>

The Bronsted acid ionic liquid was prepared by adding dropwise an equimolar amount of sulfuric acid H<sub>2</sub>SO<sub>4</sub> (98%) to the selected 1-Methylpyrrolidine base. The mixture was then stirred for 5 hours at 60 °C. After that, reduced pressure was used to remove water. The result was a pale yellow viscous liquid obtained with quantitative yield.

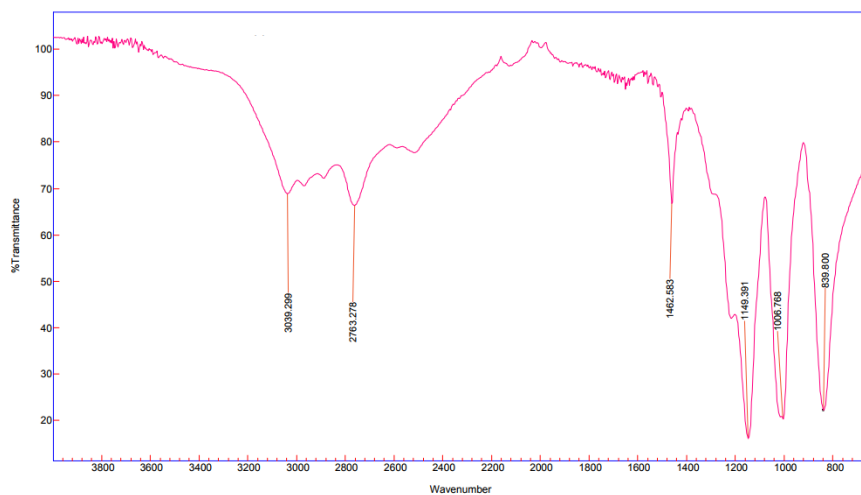

Figure S1. IR-spectra of N-methylpyrrolidinium hydrogen sulfate

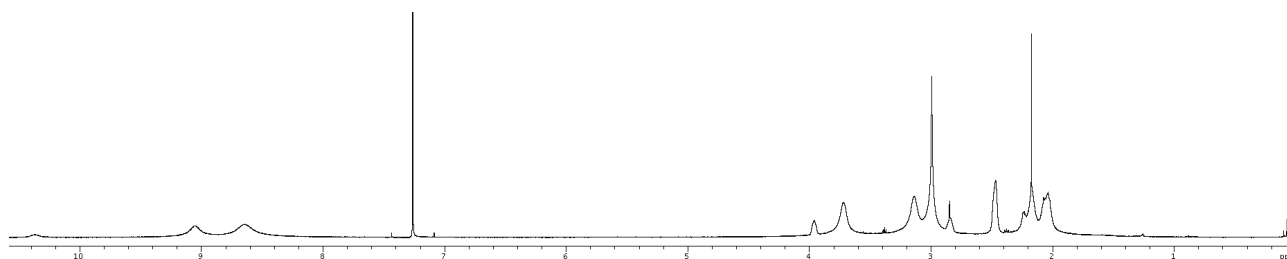

Figure S2: <sup>1</sup>H-NMR of N-methylpyrrolidinium hydrogen sulfate in CDCl<sub>3</sub>.

### Determination of loaded Cltx-Cy5 onto CNCs.

$^1\text{H-NMR}$  (600 MHz) analysis was performed on washing aqueous solution, dried under vacuum and re-dispersed in  $\text{D}_2\text{O}$ . These showed no signal for Cltx (1.0 ppm, 3.15 ppm, 3.35 ppm), meaning that the conjugation yield can be considered quantitative; other signals can be attributed to ionic liquid remained in the waste.

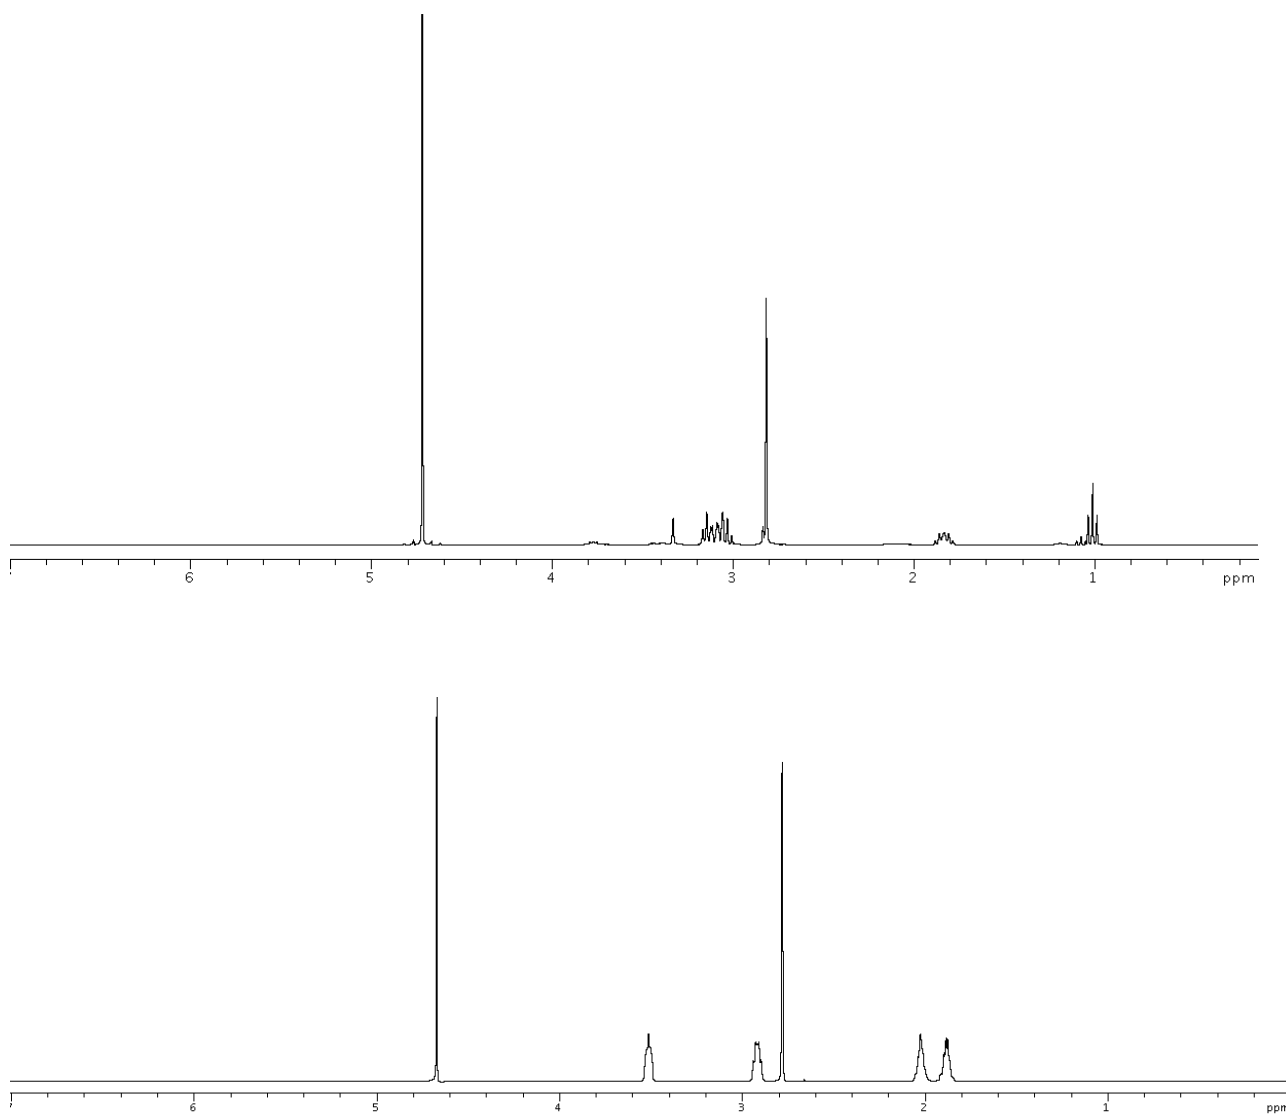

**Figure S3:** top)  $^1\text{H-NMR}$  spectrum of Cltx. bottom)  $^1\text{H-NMR}$  spectrum of residual after washings. Reference line for  $\text{D}_2\text{O}$  4.72 ppm.

### References

$^1\text{Chiappe C, Rajamani S, D'Andrea F. A dramatic effect of the ionic liquid structure in esterification reaction in protic ionic media. *Green Chem.*, 2013,15, 137-143$
